# Supplementary material for: In Vitro Preventive Effect and Mechanism of Action of Weissella cibaria CMU against Streptococcus mutans Biofilm Formation and Periodontal Pathogens
Source: MDPI journal article supplement (doi:10.3390/microorganisms11040962), 2023-04-07
Supplement: s1 [file s1]

**Table S1.** 2,2-diphenyl-1-picrylhydrazyl (DPPH) radical scavenging activities (%) of oral probiotics (Raw data)

| OD <sub>517</sub> |                       |                        |                   | DPPH radical scavenging activities (%) |                        |                   |
|-------------------|-----------------------|------------------------|-------------------|----------------------------------------|------------------------|-------------------|
| MRS blank         | <i>W. cibaria</i> CMU | <i>W. cibaria</i> CMS1 | <i>L. reuteri</i> | <i>W. cibaria</i> CMU                  | <i>W. cibaria</i> CMS1 | <i>L. reuteri</i> |
| 0.181             | 0.136                 | 0.133                  | 0.135             | 24.7                                   | 26.5                   | 25.5              |
| 0.163             | 0.136                 | 0.137                  | 0.135             | 16.4                                   | 15.9                   | 16.8              |
| 0.158             | 0.137                 | 0.144                  | 0.162             | 22.9                                   | 12.9                   | 5.6               |
| 0.157             | 0.132                 | 0.139                  | 0.142             | 15.9                                   | 11.7                   | 13.0              |
